# Supplementary material for: Phenethyl Isothiocyanate-Containing Carbomer Gel for Use against Squamous Cell Carcinoma
Source: PubMed Central journal article supplement (PMC7830123; doi:10.3390/pharmaceutics13010106), 2021-01-15
Supplement: pharmaceutics-13-00106-s001.pdf [file pharmaceutics-13-00106-s001.pdf]

# Supplementary Materials: Phenethyl Isothiocyanate-Containing Carbomer Gel for Use Against Squamous Cell Carcinoma

Ositomiwa O. Osipitan, Yi Shi and Anthony J. Di Pasqua

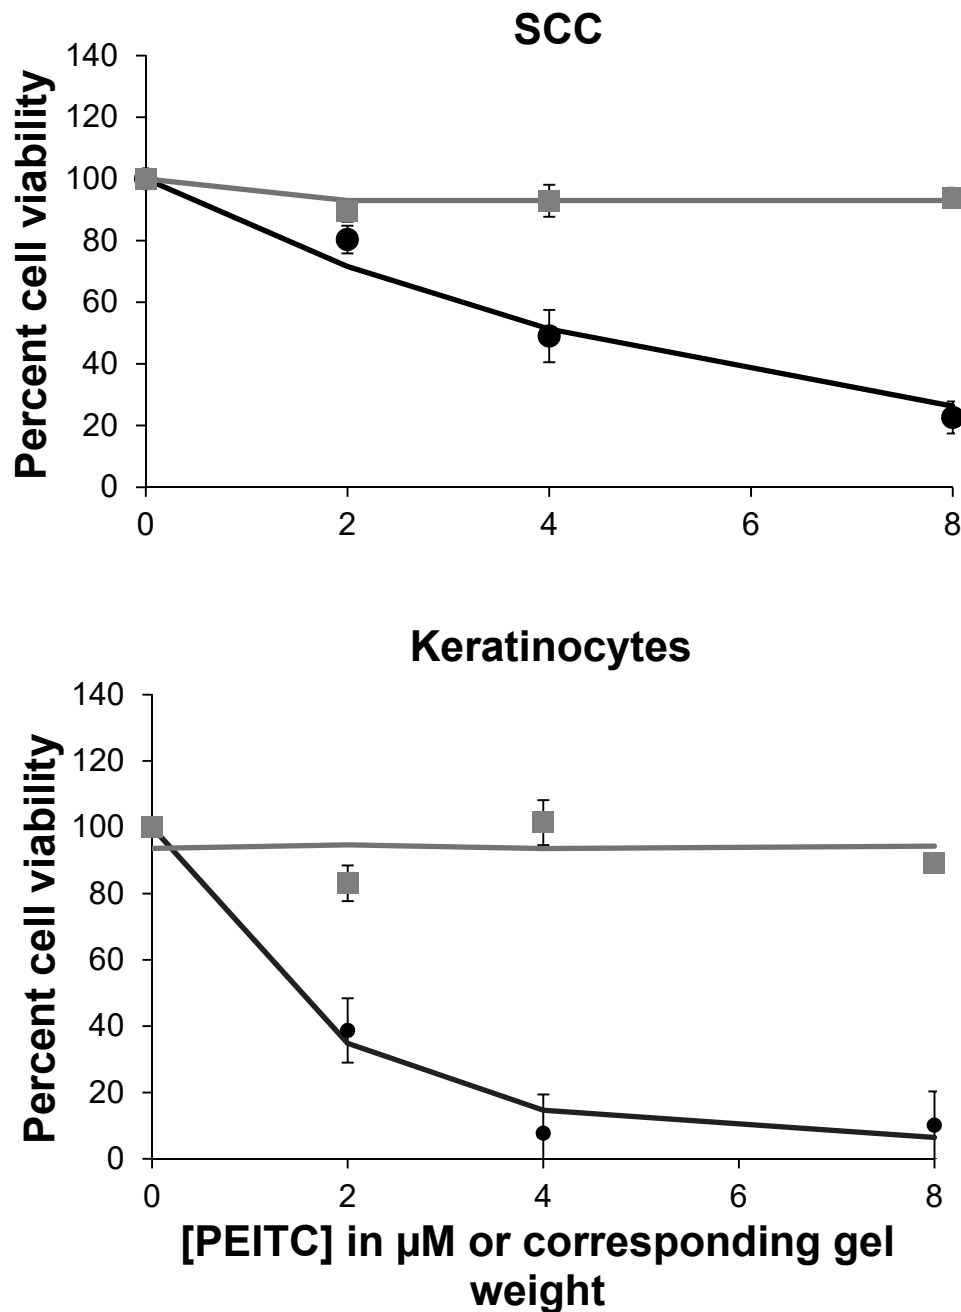

**Figure S1.** Dose-responses with treatment of phenethyl isothiocyanate (PEITC) carbomer gel at concentrations of 2, 4, and 8  $\mu\text{M}$  PEITC and blank carbomer gel at corresponding masses. Blank carbomer gel toxicities shown with gray square markers and a gray line, PEITC-carbomer gel toxicities shown with black circles and a black line.

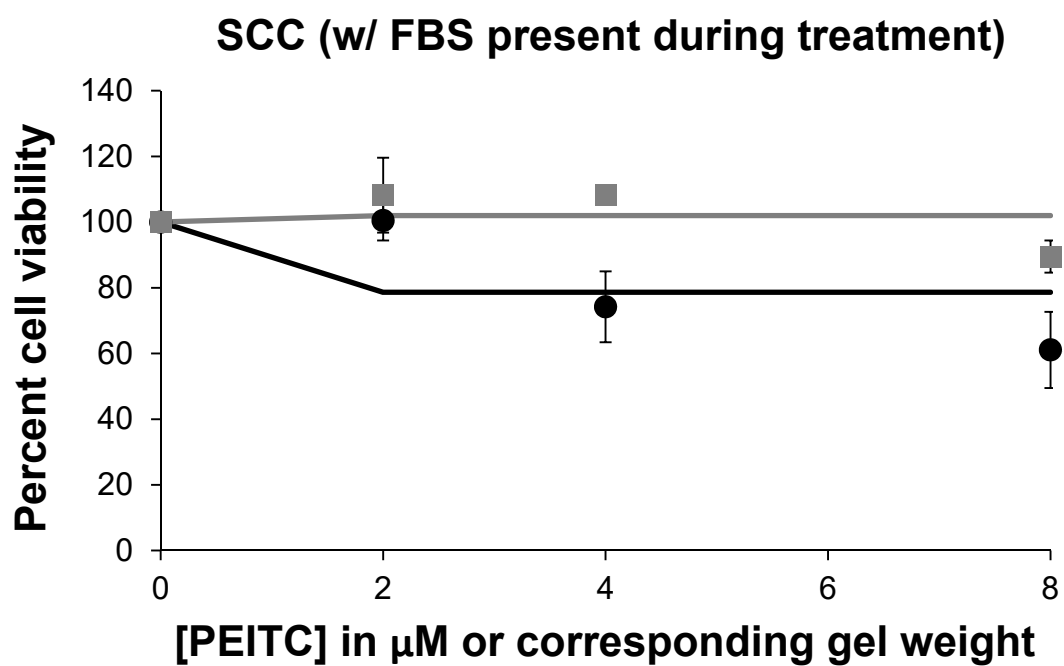

**Figure S2.** Dose-responses with treatment of phenethyl isothiocyanate (PEITC) carbomer gel at concentrations of 2, 4, and 8  $\mu\text{M}$  PEITC and blank carbomer gel at corresponding masses. Blank carbomer gel toxicities shown with gray square markers and a gray line, PEITC-carbomer gel toxicities shown with black circles and a black line.

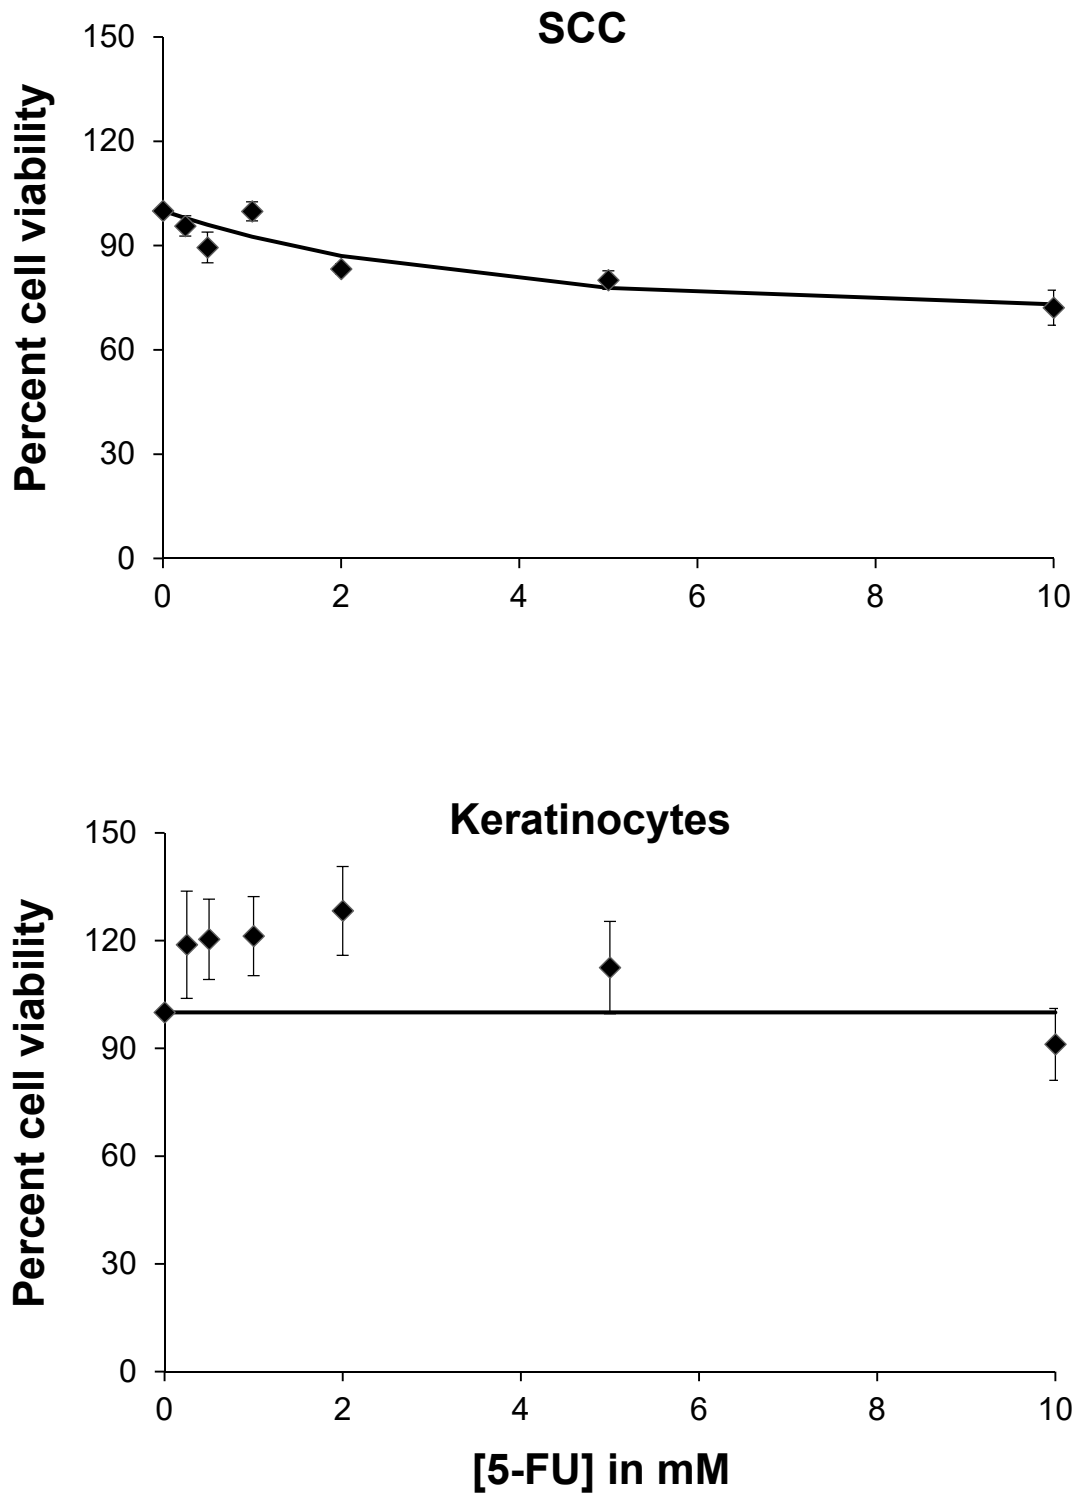

Figure S3. Dose-responses with treatment of 5-FU for 30-min continuous exposure and 24-h recovery.

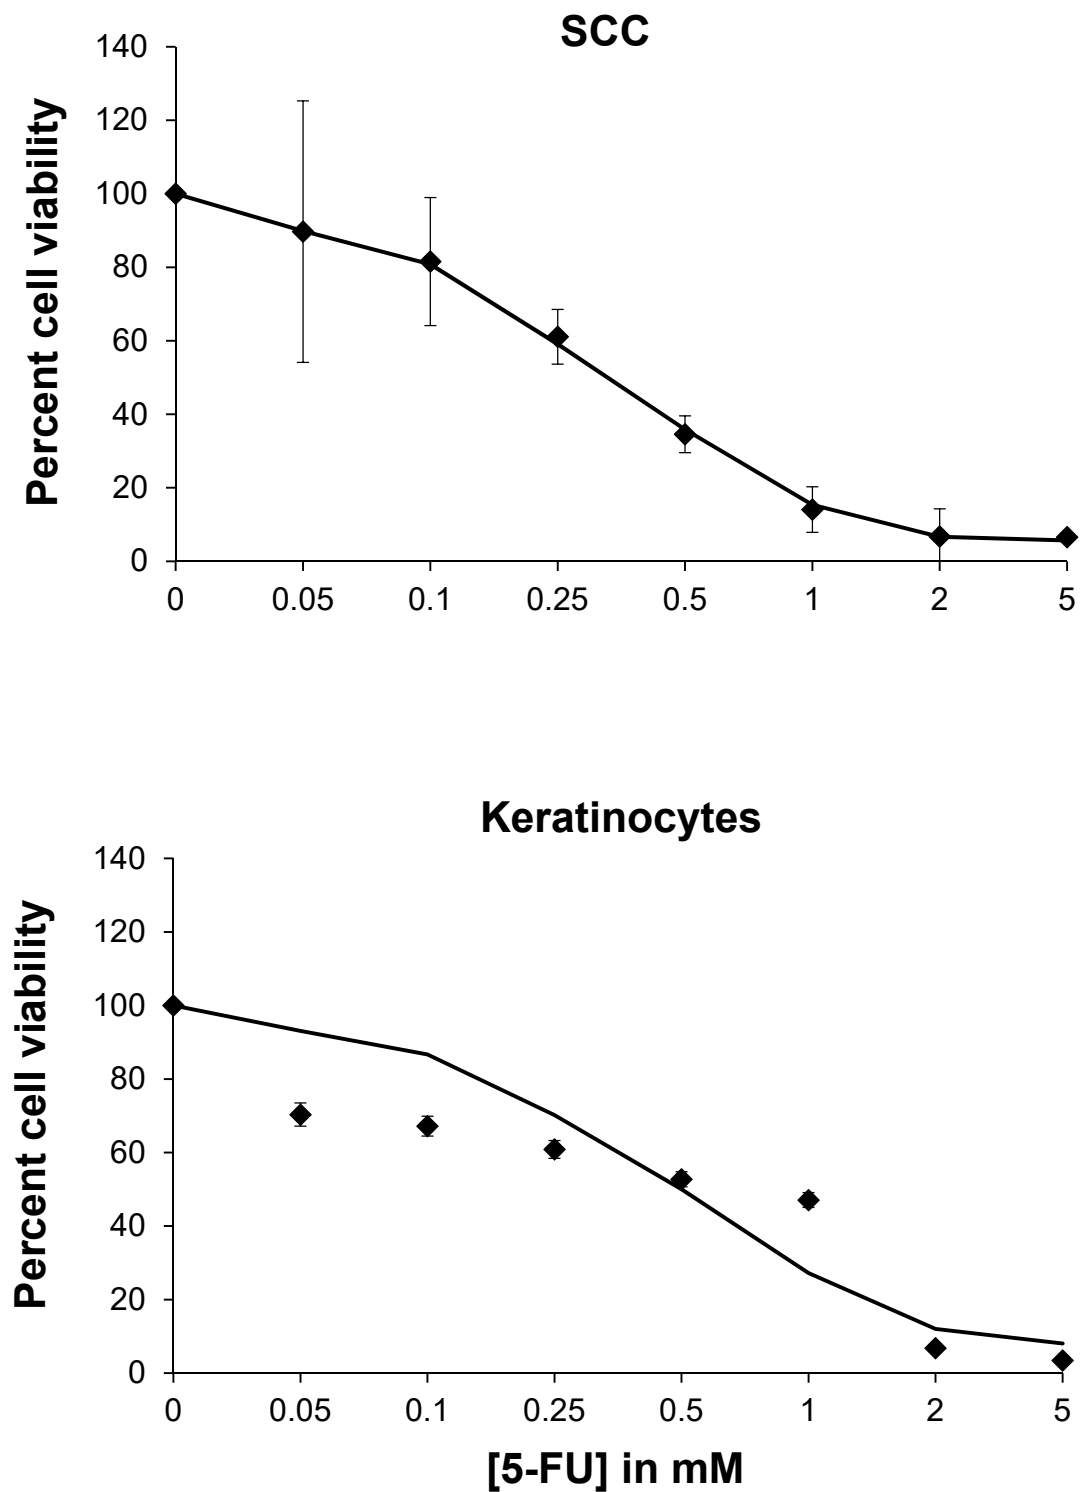

Figure S4. Dose-responses with treatment of 5-FU for 48-h continuous exposure.
